# Supplementary figures and images for: Human enteric nervous system progenitor transplantation improves functional responses in Hirschsprung disease patient-derived tissue
Source: HighWire-hosted journal article supplement (doi:10.1136/gutjnl-2023-331532), 2024-05-30

## 3D representation of cell integration

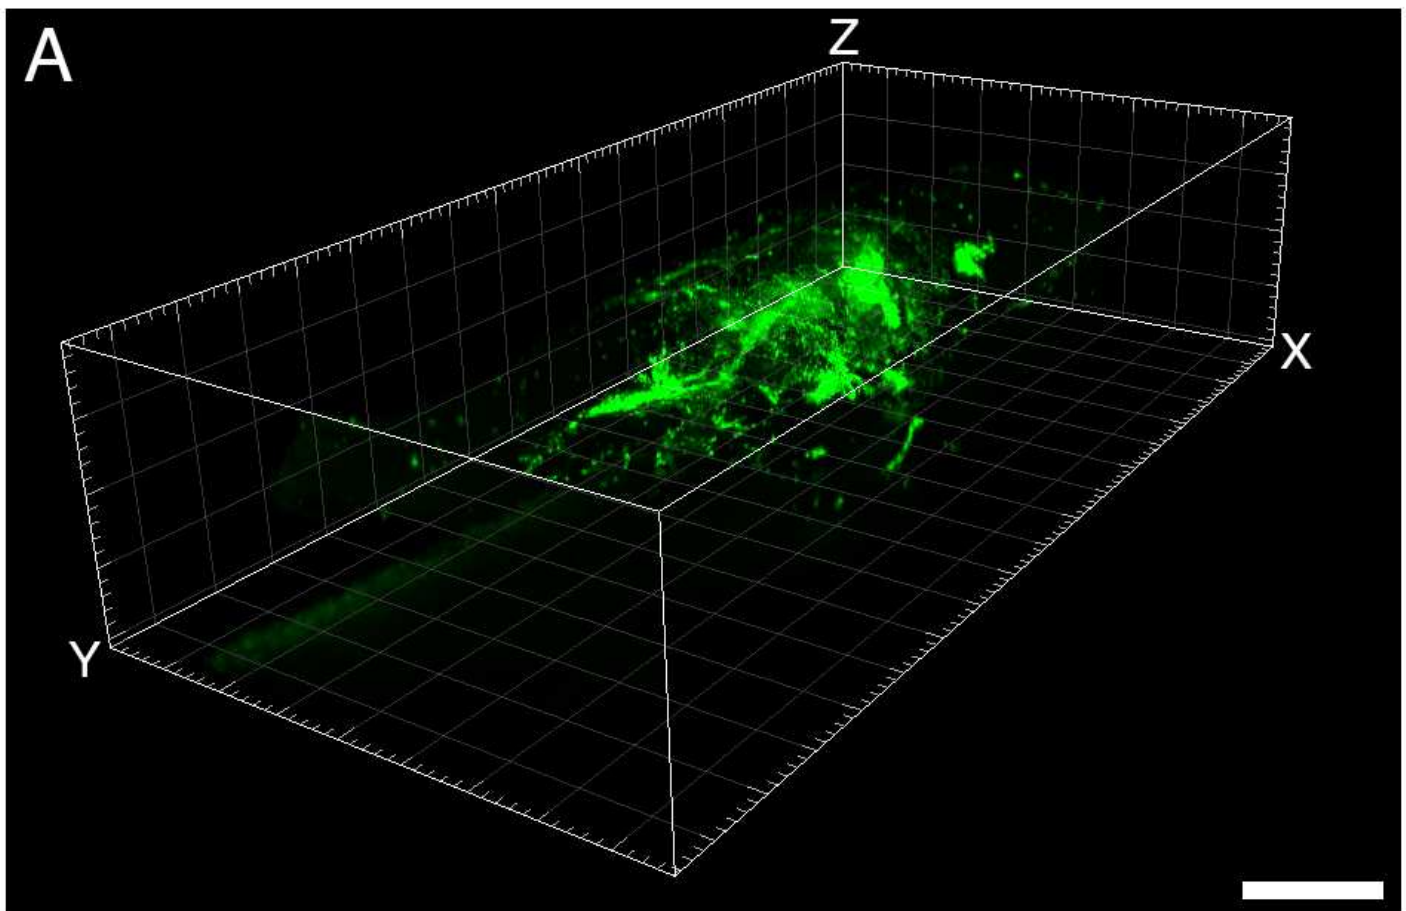

Supplement: gutjnl-2023-331532supp003_data_supplement.pdf [file gutjnl-2023-331532supp003_data_supplement.pdf]

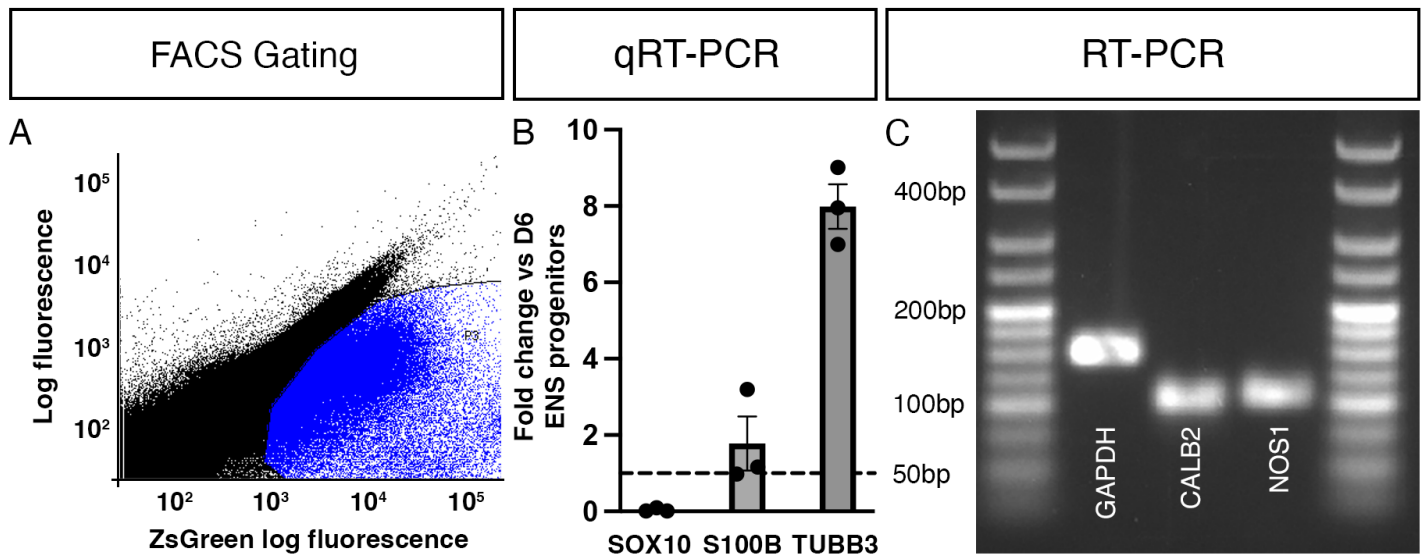

Supplement: gutjnl-2023-331532supp004_data_supplement.pdf [file gutjnl-2023-331532supp004_data_supplement.pdf]
